# Supplementary material
Source: MDPI journal article supplement (https://www.mdpi.com/2079-9276/6/3/42)

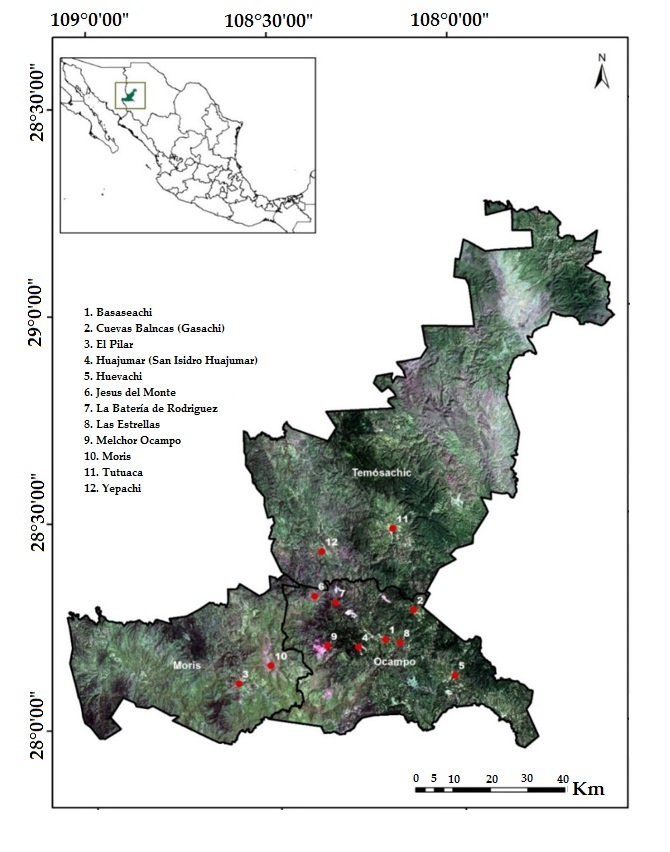

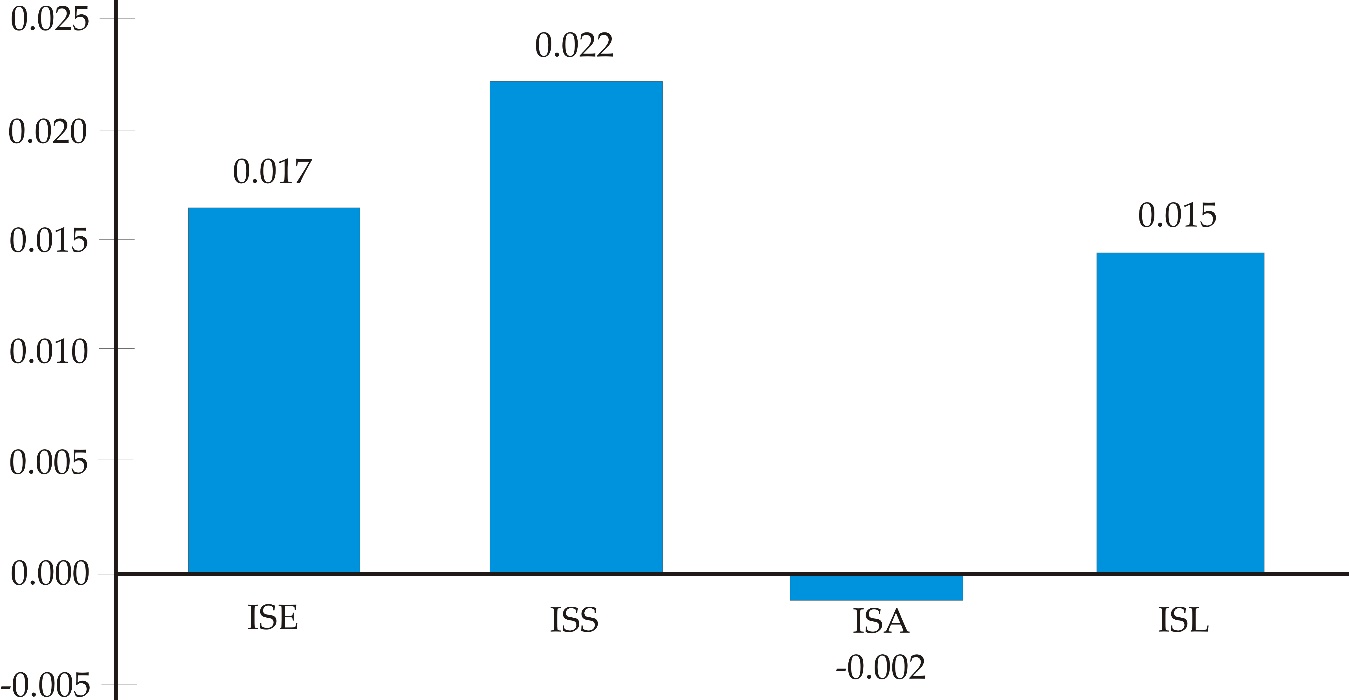

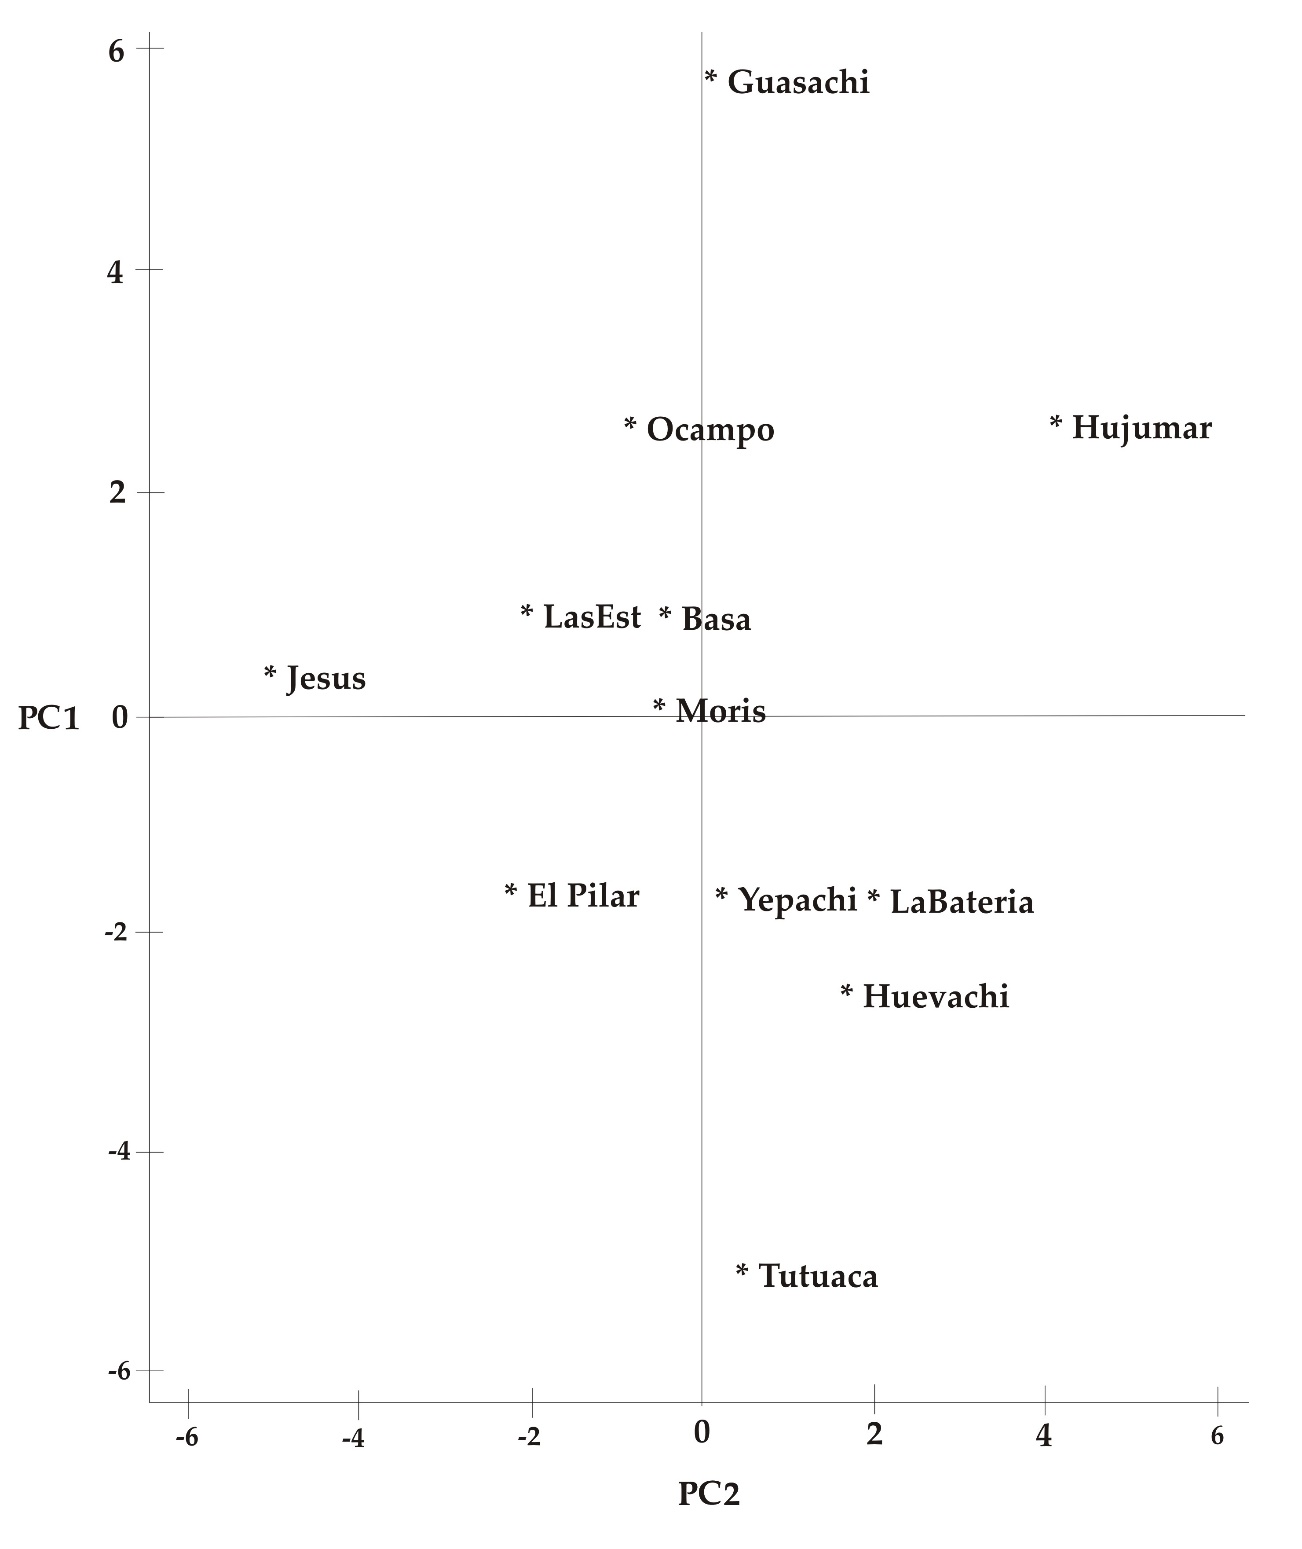

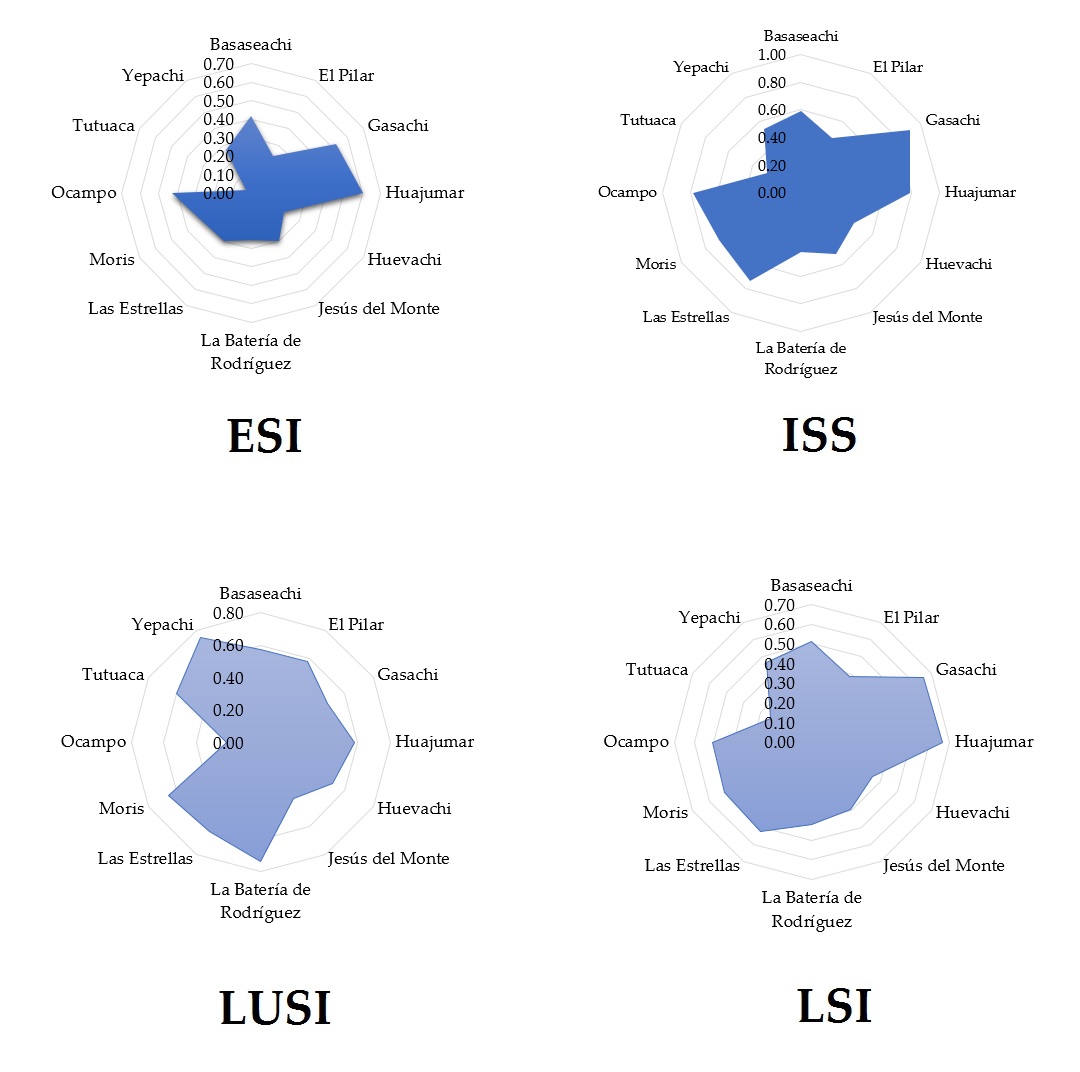

Supplement: s1 [file s1]
